# Supplementary material for: Induced magnetic field in sp-hybridized carbon rings: analysis of double aromaticity and antiaromaticity in cyclo[2N]carbon allotropes
Source: Royal Society of Chemistry journal article supplement (doi:10.1039/d0cp01252a), 2020-01-01
Supplement: d0cp01252a1.pdf [file d0cp01252a1.pdf]

## Supporting Information

# Induced Magnetic Field in *sp*-Hybridized Carbon Rings: Analysis of Double Aromaticity and Antiaromaticity in Cyclo[2*n*]carbon Allotropes

Nickolas D. Charistos<sup>\*a</sup> and Alvaro Muñoz-Castro<sup>\*b</sup>

<sup>a</sup>Aristotle University of Thessaloniki, Department of Chemistry, Laboratory of Quantum and Computational Chemistry, Thessaloniki, Greece, 54 124.

<sup>b</sup>Laboratorio de Química Inorgánica y Materiales Moleculares, Facultad de Ingeniería, Universidad Autónoma de Chile, Llano Subercaceaux 2801, San Miguel, Santiago, Chile.

| Table of contents                                                                                                                                                                                                                                     | Page |
|-------------------------------------------------------------------------------------------------------------------------------------------------------------------------------------------------------------------------------------------------------|------|
| Benchmarking of C <sub>18</sub> geometry                                                                                                                                                                                                              | S2   |
| Table S1. Bond lengths and bond length alternation of C <sub>18</sub> computed with various functionals.                                                                                                                                              | S3   |
| Figure S1. Optimized geometries of ground states of C <sub>4n+2</sub> (n=1-6) and C <sub>4n</sub> (n=2-7) carbon rings                                                                                                                                | S4   |
| Benchmarking of NICS                                                                                                                                                                                                                                  | S5   |
| Table S2. Total NICS <sub>zz</sub> (ppm) calculated at ring centers with various functionals                                                                                                                                                          | S6   |
| Table S3. Dissected NICS <sub>zz</sub> (ppm) calculated with PBE functional                                                                                                                                                                           | S7   |
| Figure S2. NICS <sub>zz</sub> trends with regard to ring size and molecular geometry of C <sub>2N</sub> (N=3-14)                                                                                                                                      | S8   |
| Figure S3. Dissected $\pi_{\text{out}}$ and $\pi_{\text{in}}$ NICS <sub>zz</sub> trends with regard to ring size and molecular geometry of C <sub>4n+2</sub> (n=1-6)                                                                                  | S8   |
| Figure S4. Linear correlation of HOMO <sub>out</sub> and HOMO <sub>in</sub> contributions to NICS <sub>zz</sub> with regard to $\pi_{\text{out}}$ and $\pi_{\text{in}}$ contributions to NICS <sub>zz</sub> of ground states C <sub>2N</sub> (N=5-14) | S9   |
| Table S4. Energy gaps of frontier $\pi_{\text{out}}$ and $\pi_{\text{in}}$ orbitals (eV) and contributions of HOMO <sub>out</sub> and HOMO <sub>in</sub> to NICS <sub>zz</sub>                                                                        | S9   |
| Figure S5. Isosurfaces of HOMO <sub>out</sub> and HOMO <sub>in</sub> contributions to B <sub>z</sub> <sup>ind</sup> of C <sub>4n+2</sub> (n=1-6)                                                                                                      | S10  |
| Figure S6. Isosurfaces of HOMO <sub>out</sub> and HOMO <sub>in</sub> contributions to B <sub>z</sub> <sup>ind</sup> of C <sub>4n</sub> (n=2-6)                                                                                                        | S10  |
| Cartesian Coordinates                                                                                                                                                                                                                                 | S12  |

## Benchmarking of C<sub>18</sub> geometry

A number of different exchange–correlation functionals (XC), including generalized gradient approximation (GGA), meta-GGA, hybrid, meta-hybrid and range-separated hybrid functionals, were tested for the optimization of C<sub>18</sub>. The bond lengths of the optimized C<sub>18</sub> structures are presented in Table S1. Among them, the following functionals with high percentage of HF exchange (HFX $\geq$ 50%) produced polyynic geometries with altering bond lengths: BHandHLYP, KMLYP,<sup>[1]</sup> CAM-B3LYP,<sup>[2]</sup> MO6-HF,<sup>[3]</sup> M06-2X,<sup>[4]</sup>  $\omega$ B97X<sup>[5]</sup> and  $\omega$ B97XD. All other functionals with lower HFX percentage and pure GGAs that were tested, namely BP86,<sup>[6]</sup> PBE, PW91,<sup>[7]</sup> B3LYP,<sup>[8]</sup> PBE0,<sup>[9]</sup> HSE06,<sup>[10]</sup> M06L,<sup>[4]</sup> MN12-SX,<sup>[11]</sup> TPSS<sup>[12]</sup> and TPSSh<sup>[13]</sup> produced cumulenic geometries with equal bond lengths. All optimizations were performed with Slater-type triple- $\zeta$  basis set with two polarization functions (TZ2P) with the ADF code, except for  $\omega$ B97XD functional which was used with 6-311++G(d,p) basis set employing Gaussian software.

**Table S1.** Bond lengths and bond length alternation of C<sub>18</sub> computed with various functionals.

| Functional                    | HFX      | d <sub>1</sub> (Å) | d <sub>2</sub> (Å) | BLA   |
|-------------------------------|----------|--------------------|--------------------|-------|
| <b>GGA</b>                    |          |                    |                    |       |
| BP86                          | 0        | 1.283              |                    | 0.000 |
| PBE                           | 0        | 1.283              |                    | 0.000 |
| PW91                          | 0        | 1.282              |                    | 0.000 |
| <b>Meta-GGA</b>               |          |                    |                    |       |
| MO6L                          | 0        | 1.274              |                    | 0.000 |
| TPSS                          | 0        | 1.281              |                    | 0.000 |
| <b>Hybrid</b>                 |          |                    |                    |       |
| B3LYP                         | 20       | 1.277              |                    | 0.000 |
| KMLYP                         | 55.7     | 1.336              | 1.207              | 0.129 |
| BHandHLYP                     | 50       | 1.339              | 1.212              | 0.127 |
| PBE0                          | 25       | 1.281              | 1.269              | 0.012 |
| <b>Meta-hybrid</b>            |          |                    |                    |       |
| MO6-2X                        | 54       | 1.346              | 1.223              | 0.123 |
| MO6-HF                        | 100      | 1.375              | 1.207              | 0.168 |
| TPSSH                         | 10       | 1.277              |                    | 0.000 |
| <b>Range-separated hybrid</b> |          |                    |                    |       |
| CAM-B3LYP                     | 19-65    | 1.341              | 1.217              | 0.124 |
| HSE06                         | 25-0     | 1.275              |                    | 0.000 |
| MN12-SX                       | 25-0     | 1.272              |                    | 0.000 |
| wb97x                         | 15.8-100 | 1.359              | 1.212              | 0.147 |
| wb97xd                        | 22.2-100 | 1.346              | 1.223              | 0.123 |

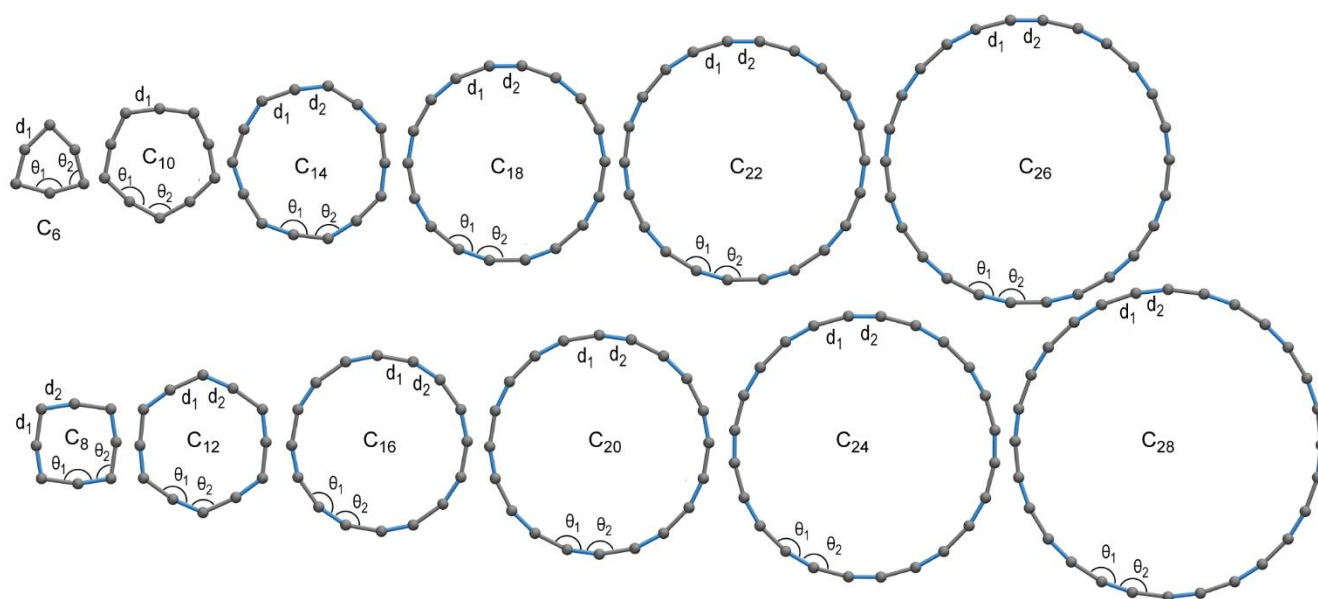

**Figure S1.** Optimized geometries of ground states of  $C_{4n+2}$  ( $n=1-6$ ) (top) and  $C_{4n}$  ( $n=2-7$ ) (bottom) carbon rings computed at the  $\omega$ B97XD/6-311++G(d,p) level. Blue shades depict short bonds.

## Benchmarking of NICS

NICS<sub>zz</sub> values at the center of each ring were calculated using PBE, B3LYP, CAM-B3LYP,  $\omega$ B97X-D, BHandHLYP and KMLYP functionals (Table S2, Figures S2-S3). All calculations were performed with TZ2P Slater basis set using ADF, except for CAM-B3LYP and  $\omega$ B97X-D which were performed with 6-311++G(d,p) Gaussian basis set with Gaussian09. All functionals produce the same qualitative trends of NICS<sub>zz</sub> values with regard to ring size and bonding pattern, but there are significant quantitative differences among different types of functionals, except for small cumulenic rings C<sub>6</sub> and C<sub>10</sub>. Pure GGA PBE overestimates NICS<sub>zz</sub> producing significant larger values with regard to other functionals. Hybrid GGAs with high HF exchange ( $\geq 50\%$ ) BHandHLYP and KMLYP and range-separated hybrid CAM-B3LYP and  $\omega$ B97X-D produce almost identical NICS<sub>zz</sub>, which is significantly smaller than PBE. Hybrid-GGA with small HF exchange (20%) B3LYP produce intermediate NICS<sub>zz</sub> values with regard to PBE and BHandHLYP for polyynic geometries, whereas it produces identical results with PBE for cumulenic transition states. The discrepancy between high HF exchange and low (or zero) HF exchange functionals is smaller in cumulenic geometries with regard to polyynic geometries, whereas dissection to  $\pi_{\text{out}}$  and  $\pi_{\text{in}}$  contributions reveals that PBE performs equivalent to BHandHLYP for the former and overestimates the response of the latter (Figure S3). Hence the choice of functional for the quantitative measurement of the magnetic response is sensitive to the bonding pattern, where polyynic structures are more accurately modelled by high HF exchange hybrid functionals, whereas cumulenic geometries are effectively described by pure GGAs and low HF exchange hybrids. However, although PBE and B3LYP overestimate the magnetic response of polyynic structures, they accurately reproduce the qualitative features of the magnetic response with regard to the ring size and bonding pattern of C<sub>2N</sub> rings

**Table S2.** Total NICS<sub>zz</sub> (ppm) calculated at ring centers with various functionals.

| Molecule           | PBE    | B3LYP  | BHandHLYP | KMLYP  | CAM-B3LYP | $\omega$ B97X-D |
|--------------------|--------|--------|-----------|--------|-----------|-----------------|
| C <sub>6</sub>     | -30.8  | -33.9  | -37.7     | -37.7  | -33.4     | -33.5           |
| C <sub>8</sub>     | 157.6  | 147.2  | 130.9     | 130.6  | 131.7     | 135.2           |
| C <sub>10</sub>    | -67.7  | -66.9  | -65.2     | -65.9  | -67.8     | -68.3           |
| C <sub>12</sub>    | 153.9  | 128.8  | 96.8      | 94.9   | 98.2      | 98.5            |
| C <sub>14</sub>    | -92.4  | -89.3  | -81.6     | -81.5  | -83.2     | -83.0           |
| C <sub>14</sub> TS | -96.2  | -94.4  | -89.2     | -89.6  | -89.0     | -89.0           |
| C <sub>16</sub>    | 112.1  | 86.5   | 57.9      | 54.9   | 56.4      | 53.9            |
| C <sub>18</sub>    | -68.4  | -57.2  | -44.7     | -40.9  | -40.2     | -38.4           |
| C <sub>18</sub> TS | -110.7 | -109.3 | -101.5    | -101.1 | -101.4    | -100.1          |
| C <sub>20</sub>    | 81.5   | 57.4   | 33.4      | 31.0   | 32.4      | 29.4            |
| C <sub>22</sub>    | -50.7  | -36.9  | -22.0     | -19.6  | -20.2     | -18.3           |
| C <sub>22</sub> TS | -116.6 | -115.6 | -104.0    | -102.2 | -104.4    | -99.9           |
| C <sub>24</sub>    | 57.1   | 36.6   | 18.6      | 16.9   | 17.9      | 15.4            |
| C <sub>26</sub>    | -37.2  | -23.4  | -10.9     | -9.5   | -9.8      | -8.5            |
| C <sub>26</sub> TS | -119.3 | -118.3 | -99.3     | -95.0  | -100.7    | -89.9           |
| C <sub>28</sub>    | 40.0   | 23.3   | 10.5      | 9.4    | 10.0      | 8.0             |

**Table S3.** Dissected NICS<sub>zz</sub> values (ppm) computed at the PBE functional.

| Molecule                        | Point Group             | $\pi$ -out | $\pi$ -in | HOMO-out | HOMO-in |
|---------------------------------|-------------------------|------------|-----------|----------|---------|
| C <sub>6</sub>                  | <i>D</i> <sub>3h</sub>  | -38.7      | 21.0      | -24.5    | 39.3    |
| C <sub>8</sub>                  | <i>C</i> <sub>4h</sub>  | 138.0      | 31.7      | 173.1    | 46.1    |
| C <sub>10</sub>                 | <i>D</i> <sub>5h</sub>  | -51.5      | -8.3      | -19.1    | 21.1    |
| C <sub>12</sub>                 | <i>C</i> <sub>6h</sub>  | 107.6      | 51.3      | 151.7    | 87.8    |
| C <sub>14</sub>                 | <i>C</i> <sub>7h</sub>  | -53.4      | -35.0     | -11.8    | 5.6     |
| C <sub>14</sub> TS              | <i>D</i> <sub>7h</sub>  | -56.9      | -35.3     | -15.1    | 5.2     |
| C <sub>16</sub>                 | <i>C</i> <sub>8h</sub>  | 55.3       | 60.2      | 101.7    | 105.5   |
| C <sub>18</sub>                 | <i>C</i> <sub>9h</sub>  | -34.5      | -31.0     | 10.7     | 14.3    |
| C <sub>18</sub> TS              | <i>D</i> <sub>9h</sub>  | -59.4      | -48.7     | -12.2    | -2.1    |
| C <sub>18</sub> H <sub>18</sub> | <i>D</i> <sub>6h</sub>  | -46.7      | -         | -5.9     | -       |
| C <sub>18</sub> H <sub>6</sub>  | <i>D</i> <sub>3h</sub>  | -24.9      | 16.3      | 14.7     | 35.1    |
| C <sub>20</sub>                 | <i>C</i> <sub>10h</sub> | 40.2       | 43.6      | 87.6     | 90.2    |
| C <sub>22</sub>                 | <i>C</i> <sub>11h</sub> | -25.6      | -23.0     | 21.7     | 24.3    |
| C <sub>22</sub> TS              | <i>D</i> <sub>11h</sub> | -60.7      | -54.0     | -10.2    | -4.0    |
| C <sub>24</sub>                 | <i>C</i> <sub>12h</sub> | 28.3       | 30.6      | 75.1     | 76.8    |
| C <sub>26</sub>                 | <i>C</i> <sub>13h</sub> | -18.8      | -16.8     | 29.6     | 31.5    |
| C <sub>26</sub> TS              | <i>D</i> <sub>13h</sub> | -61.4      | -56.3     | -8.7     | -4.1    |
| C <sub>28</sub>                 | <i>C</i> <sub>14h</sub> | 19.9       | 21.5      | 65.4     | 66.5    |

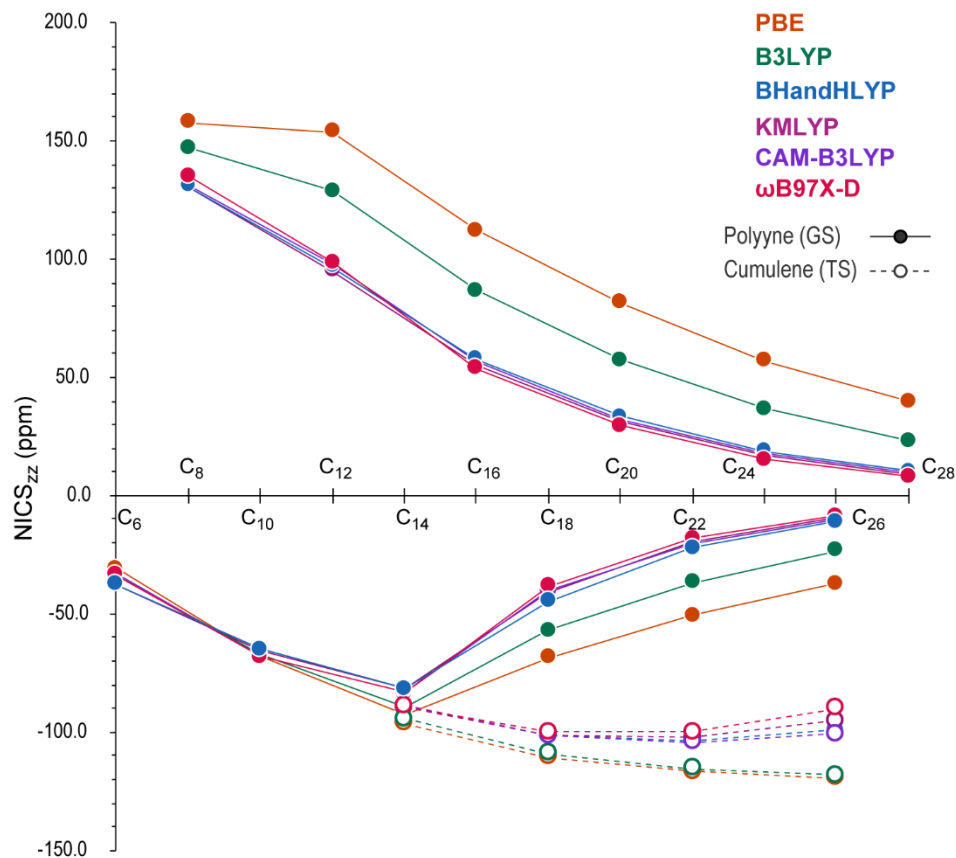

**Figure S2.**  $\text{NICS}_{zz}$  trends with regard to ring size and molecular geometry of  $\text{C}_{2N}$  ( $N=3-14$ ) molecules computed with different functionals.

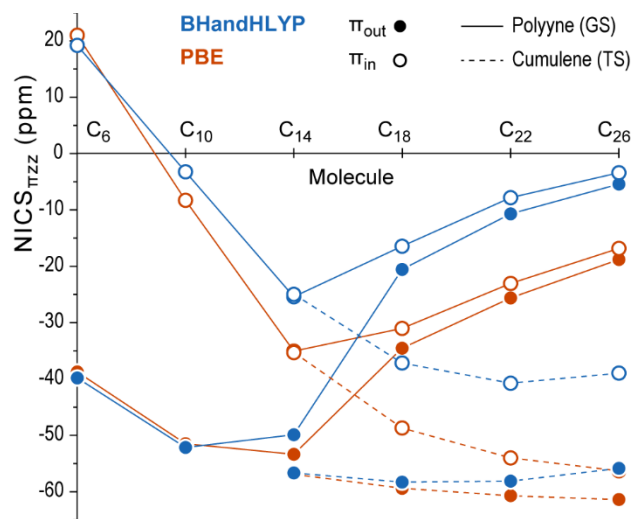

**Figure S3.** Dissected  $\pi_{\text{out}}$  and  $\pi_{\text{in}}$   $\text{NICS}_{zz}$  trends with regard to ring size and molecular geometry of  $\text{C}_{4n+2}$  ( $n=1-6$ ) molecules computed with PBE and BHandHLYP functionals.



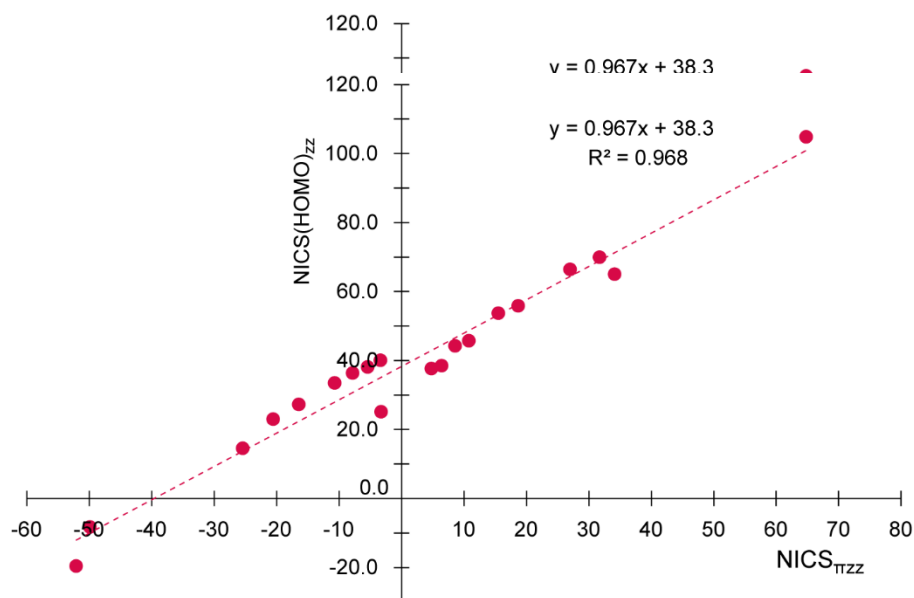

**Figure S4.** Linear correlation of HOMO<sub>out</sub> and HOMO<sub>in</sub> contributions to NICS<sub>zz</sub> with regard to  $\pi_{out}$  and  $\pi_{in}$  contributions to NICS<sub>zz</sub> of ground states C<sub>2N</sub> (N=5-14).

**Table S4.** Energy gaps of frontier  $\pi_{out}$  and  $\pi_{in}$  orbitals (eV) and contributions of HOMO<sub>out</sub> and HOMO<sub>in</sub> to NICS<sub>zz</sub> (ppm) computed with BHandHLYP functional.

| Molecule           | Gap <sub>out</sub> | Gap <sub>in</sub> | NICS <sub>zz</sub><br>HOMO <sub>out</sub> | NICS <sub>zz</sub><br>HOMO <sub>in</sub> | Molecule        | Gap <sub>out</sub> | Gap <sub>in</sub> | NICS <sub>zz</sub><br>HOMO <sub>out</sub> | NICS <sub>zz</sub><br>HOMO <sub>in</sub> |
|--------------------|--------------------|-------------------|-------------------------------------------|------------------------------------------|-----------------|--------------------|-------------------|-------------------------------------------|------------------------------------------|
| C <sub>6</sub>     |                    |                   | -25.5                                     | 36.0                                     | C <sub>8</sub>  |                    |                   | 144.1                                     | 40.5                                     |
| C <sub>10</sub>    | 7.32               | 7.78              | -19.6                                     | 25.2                                     | C <sub>12</sub> | 4.51               | 5.43              | 104.8                                     | 65.0                                     |
| C <sub>14</sub>    | 5.72               | 5.89              | -8.3                                      | 14.6                                     | C <sub>16</sub> | 4.53               | 4.48              | 66.4                                      | 70.0                                     |
| C <sub>14</sub> TS | 5.66               | 5.90              | -14.6                                     | 14.3                                     | C <sub>20</sub> | 4.34               | 4.31              | 53.7                                      | 55.9                                     |
| C <sub>18</sub>    | 5.43               | 5.34              | 23.0                                      | 27.3                                     | C <sub>24</sub> | 4.25               | 4.23              | 44.3                                      | 45.7                                     |
| C <sub>18</sub> TS | 4.53               | 4.73              | -10.9                                     | 8.6                                      | C <sub>28</sub> | 4.20               | 4.19              | 37.7                                      | 38.5                                     |
| C <sub>22</sub>    | 5.11               | 5.06              | 33.5                                      | 36.3                                     |                 |                    |                   |                                           |                                          |
| C <sub>22</sub> TS | 3.84               | 4.02              | -7.4                                      | 8.7                                      |                 |                    |                   |                                           |                                          |
| C <sub>26</sub>    | 4.88               | 4.85              | 38.2                                      | 40.1                                     |                 |                    |                   |                                           |                                          |
| C <sub>26</sub> TS | 3.37               | 3.56              | -3.0                                      | 12.5                                     |                 |                    |                   |                                           |                                          |

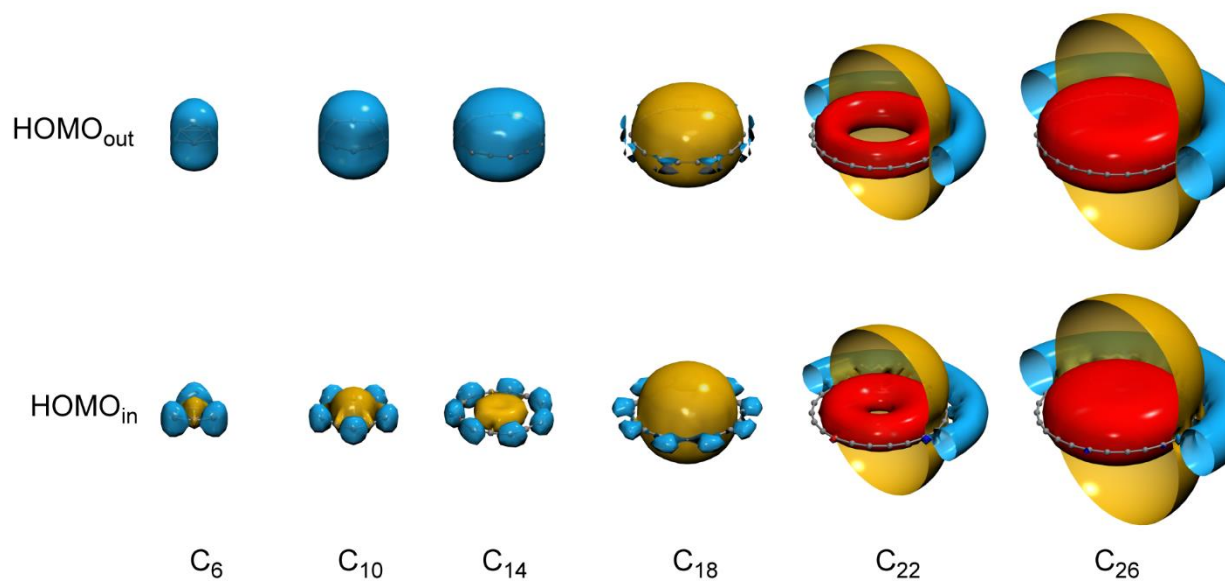

**Figure S5.** Isosurfaces of HOMO<sub>out</sub> (top) and HOMO<sub>in</sub> (bottom) contributions to  $B_z^{\text{ind}}$  of ground states  $C_{4n+2}$  ( $n=1-6$ ) rings. Isovalues: cyan -5ppm, orange +5ppm, red +25ppm.

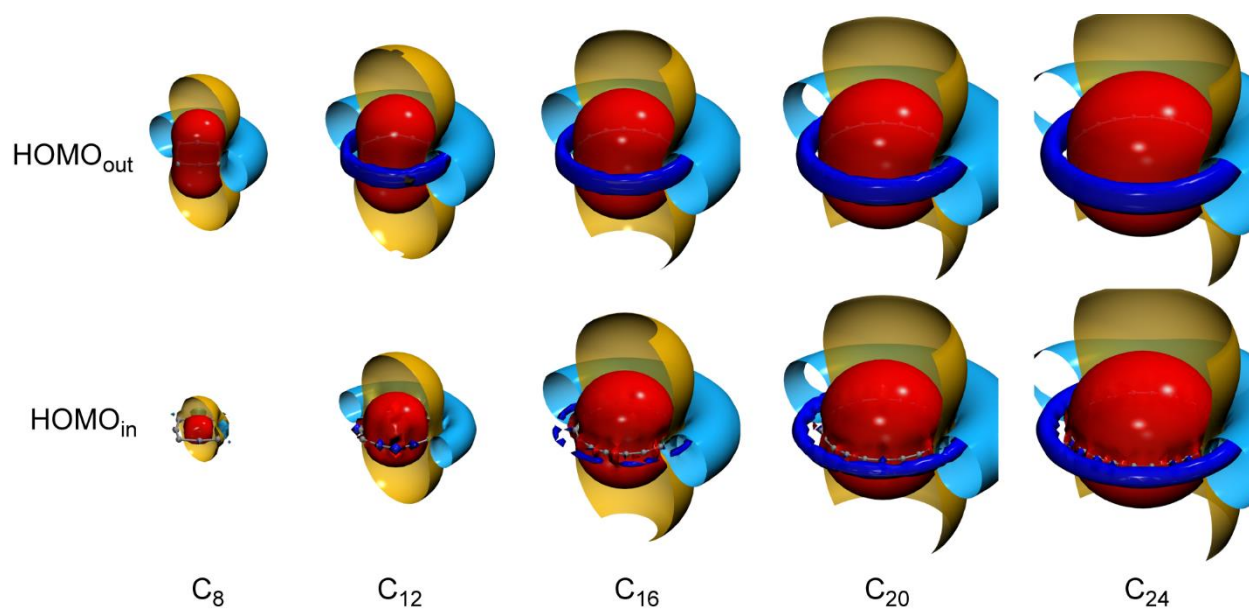

**Figure S6.** Isosurfaces of HOMO<sub>out</sub> (top) and HOMO<sub>in</sub> (bottom) contributions to  $B_z^{\text{ind}}$  of  $C_{4n}$  ( $n=2-6$ ) rings. Isovalues: cyan -5ppm, orange +5ppm, blue -25ppm, red +25ppm.

## References

- [1] J. K. Kang, C. B. Musgrave, *J. Chem. Phys.* **2001**, *115*, 11040–11051.
- [2] T. Yanai, D. P. Tew, N. C. Handy, *Chem. Phys. Lett.* **2004**, *393*, 51–57.
- [3] Y. Zhao, D. G. Truhlar, *J. Phys. Chem. A* **2006**, *110*, 13126–13130.
- [4] Y. Zhao, D. G. Truhlar, *Theor. Chem. Acc.* **2008**, *120*, 215–241.
- [5] J. Da Chai, M. Head-Gordon, *J. Chem. Phys.* **2008**, *128*, 084106.
- [6] A. D. Becke, *Phys. Rev. A* **1988**, *38*, 3098–3100.
- [7] J. P. Perdew, J. A. Chevary, S. H. Vosko, K. A. Jackson, M. R. Pederson, D. J. Singh, C. Fiolhais, *Phys. Rev. B* **1992**, *46*, 6671–6687.
- [8] P. J. Stephens, F. J. Devlin, C. F. Chabalowski, M. J. Frisch, *J. Phys. Chem.* **1994**, *98*, 11623–11627.
- [9] M. Ernzerhof, G. E. Scuseria, *J. Chem. Phys.* **1999**, *110*, 5029–5036.
- [10] J. Heyd, G. E. Scuseria, M. Ernzerhof, *J. Chem. Phys.* **2003**, *118*, 8207–8215.
- [11] R. Peverati, D. G. Truhlar, *Phys. Chem. Chem. Phys.* **2012**, *14*, 16187–16191.
- [12] J. Tao, J. P. Perdew, V. N. Staroverov, G. E. Scuseria, *Phys. Rev. Lett.* **2003**, *91*, 146401.
- [13] G. I. Csonka, J. P. Perdew, A. Ruzsinszky, *J. Chem. Theory Comput.* **2010**, *6*, 3688–3703.

## Cartesian Coordinates

$\omega$ B97XD/6-311++G(d,p)

### **C<sub>6</sub> D<sub>3h</sub>**

E = -228.206530

|   |            |            |           |
|---|------------|------------|-----------|
| C | 0.0000000  | -1.0859440 | 0.0000000 |
| C | 1.2735170  | -0.7352820 | 0.0000000 |
| C | 0.9405770  | 0.5430000  | 0.0000000 |
| C | 0.0000000  | 1.4705090  | 0.0000000 |
| C | -0.9405770 | 0.5430000  | 0.0000000 |
| C | -1.2735170 | -0.7352820 | 0.0000000 |

### **C<sub>8</sub> C<sub>4h</sub>**

E = -304.335629

|   |            |            |           |
|---|------------|------------|-----------|
| C | -1.3027820 | 1.3027820  | 0.0000000 |
| C | -0.0672930 | 1.4993900  | 0.0000000 |
| C | 0.0672930  | -1.4993900 | 0.0000000 |
| C | 1.3027820  | 1.3027820  | 0.0000000 |
| C | 1.3027820  | -1.3027820 | 0.0000000 |
| C | 1.4993900  | 0.0672930  | 0.0000000 |
| C | -1.3027820 | -1.3027820 | 0.0000000 |
| C | -1.4993900 | -0.0672930 | 0.0000000 |

### **C<sub>10</sub> D<sub>5h</sub>**

E = -380.575446

|   |            |            |           |
|---|------------|------------|-----------|
| C | 1.2790080  | 1.7604040  | 0.0000000 |
| C | 0.0000000  | 1.9283100  | 0.0000000 |
| C | 1.1334320  | -1.5600360 | 0.0000000 |
| C | -1.2790080 | 1.7604040  | 0.0000000 |
| C | 0.0000000  | -2.1759790 | 0.0000000 |
| C | -1.8339320 | 0.5958810  | 0.0000000 |

|   |            |            |           |
|---|------------|------------|-----------|
| C | 2.0694790  | -0.6724140 | 0.0000000 |
| C | 1.8339320  | 0.5958810  | 0.0000000 |
| C | -2.0694790 | -0.6724140 | 0.0000000 |
| C | -1.1334320 | -1.5600360 | 0.0000000 |

**C<sub>12</sub> C<sub>6h</sub>**

E = -456.681834

|   |            |            |           |
|---|------------|------------|-----------|
| C | 0.0000000  | 2.5793970  | 0.0000000 |
| C | 1.1280850  | 2.0803390  | 0.0000000 |
| C | 2.2338240  | 1.2896990  | 0.0000000 |
| C | -2.2338240 | 1.2896990  | 0.0000000 |
| C | -2.3656690 | -0.0632190 | 0.0000000 |
| C | -2.2338240 | -1.2896990 | 0.0000000 |
| C | 2.3656690  | 0.0632190  | 0.0000000 |
| C | -1.2375840 | 2.0171200  | 0.0000000 |
| C | -1.1280850 | -2.0803390 | 0.0000000 |
| C | 2.2338240  | -1.2896990 | 0.0000000 |
| C | 1.2375840  | -2.0171200 | 0.0000000 |
| C | 0.0000000  | -2.5793970 | 0.0000000 |

**C<sub>14</sub> C<sub>7h</sub>**

E = -532.870509

|   |            |            |           |
|---|------------|------------|-----------|
| C | -1.8300790 | 2.2948460  | 0.0000000 |
| C | -0.5956820 | 2.7253300  | 0.0000000 |
| C | 0.6531480  | 2.8616270  | 0.0000000 |
| C | -1.8300790 | -2.2948460 | 0.0000000 |
| C | -0.6457850 | -2.7138940 | 0.0000000 |
| C | 0.6531480  | -2.8616270 | 0.0000000 |
| C | 1.7593470  | 2.1649390  | 0.0000000 |
| C | -2.5021510 | 1.2334920  | 0.0000000 |
| C | -2.5244480 | -1.1871900 | 0.0000000 |

|   |            |            |           |
|---|------------|------------|-----------|
| C | 1.7191680  | -2.1969810 | 0.0000000 |
| C | 2.6445410  | 1.2735440  | 0.0000000 |
| C | 2.7895520  | -0.0256960 | 0.0000000 |
| C | 2.6445410  | -1.2735440 | 0.0000000 |
| C | -2.9352190 | 0.0000000  | 0.0000000 |

**C<sub>14</sub> D<sub>7h</sub> TS**

E = -532.870323

|   |            |            |           |
|---|------------|------------|-----------|
| C | 0.6658156  | 2.8593626  | 0.0000000 |
| C | -0.6063816 | 2.7113108  | 0.0000000 |
| C | -1.8204423 | 2.3033139  | 0.0000000 |
| C | -2.4978760 | 1.2163169  | 0.0000000 |
| C | -2.9361268 | 0.0128347  | 0.0000000 |
| C | -2.5082764 | -1.1943892 | 0.0000000 |
| C | -1.8404759 | -2.2872995 | 0.0000000 |
| C | -0.6300058 | -2.7058595 | 0.0000000 |
| C | 0.6408267  | -2.8653253 | 0.0000000 |
| C | 1.7226534  | -2.1796900 | 0.0000000 |
| C | 2.6394969  | -1.2853588 | 0.0000000 |
| C | 2.7781054  | -0.0120959 | 0.0000000 |
| C | 2.6509281  | 1.2623731  | 0.0000000 |
| C | 1.7417588  | 2.1645063  | 0.0000000 |

**C<sub>16</sub> C<sub>8h</sub>**

E = -609.001310

|   |            |            |           |
|---|------------|------------|-----------|
| C | -0.0754360 | 3.2966470  | 0.0000000 |
| C | 1.2679410  | 3.0610800  | 0.0000000 |
| C | 2.2777400  | 2.3844230  | 0.0000000 |
| C | 3.0610800  | 1.2679410  | 0.0000000 |
| C | 3.2966470  | 0.0754360  | 0.0000000 |
| C | 3.0610800  | -1.2679410 | 0.0000000 |
| C | 2.3844230  | -2.2777400 | 0.0000000 |

|   |            |            |           |
|---|------------|------------|-----------|
| C | 1.2679410  | -3.0610800 | 0.0000000 |
| C | 0.0754360  | -3.2966470 | 0.0000000 |
| C | -1.2679410 | -3.0610800 | 0.0000000 |
| C | -2.2777400 | -2.3844230 | 0.0000000 |
| C | -1.2679410 | 3.0610800  | 0.0000000 |
| C | -3.0610800 | 1.2679410  | 0.0000000 |
| C | -2.3844230 | 2.2777400  | 0.0000000 |
| C | -3.0610800 | -1.2679410 | 0.0000000 |
| C | -3.2966470 | -0.0754360 | 0.0000000 |

**C<sub>18</sub> C<sub>9h</sub>**

E = -685.16711831

|   |            |            |           |
|---|------------|------------|-----------|
| C | 1.8496640  | 3.2037110  | 0.0000000 |
| C | 0.5804130  | 3.6511990  | 0.0000000 |
| C | -0.6423810 | 3.6431260  | 0.0000000 |
| C | -1.9023230 | 3.1700630  | 0.0000000 |
| C | -2.8338490 | 2.3778820  | 0.0000000 |
| C | -3.4949410 | 1.2056190  | 0.0000000 |
| C | -3.6993270 | 0.0000000  | 0.0000000 |
| C | -3.4522370 | -1.3229470 | 0.0000000 |
| C | -2.8338490 | -2.3778820 | 0.0000000 |
| C | -1.7941930 | -3.2324920 | 0.0000000 |
| C | -0.6423810 | -3.6431260 | 0.0000000 |
| C | 0.7033740  | -3.6295180 | 0.0000000 |
| C | 1.8496640  | -3.2037110 | 0.0000000 |
| C | 2.8718250  | -2.3282520 | 0.0000000 |
| C | 3.4762300  | -1.2652440 | 0.0000000 |
| C | 3.6965170  | 0.0624290  | 0.0000000 |
| C | 3.4762300  | 1.2652440  | 0.0000000 |
| C | 2.7915680  | 2.4238980  | 0.0000000 |

**C<sub>18</sub> D<sub>9h</sub> TS**

E = -685.14975271

|   |            |            |           |
|---|------------|------------|-----------|
| C | 0.0000000  | 3.6131830  | 0.0000000 |
| C | 1.2718520  | 3.4943840  | 0.0000000 |
| C | 2.3225090  | 2.7678590  | 0.0000000 |
| C | 3.2204420  | 1.8593230  | 0.0000000 |
| C | 3.5582900  | 0.6274230  | 0.0000000 |
| C | 3.6621510  | -0.6457360 | 0.0000000 |
| C | 3.1291080  | -1.8065910 | 0.0000000 |
| C | 2.3902990  | -2.8486480 | 0.0000000 |
| C | 1.2357810  | -3.3952810 | 0.0000000 |
| C | 0.0000000  | -3.7186460 | 0.0000000 |
| C | -1.2357810 | -3.3952810 | 0.0000000 |
| C | -2.3902990 | -2.8486480 | 0.0000000 |
| C | -3.1291080 | -1.8065910 | 0.0000000 |
| C | -3.6621510 | -0.6457360 | 0.0000000 |
| C | -3.5582900 | 0.6274230  | 0.0000000 |
| C | -3.2204420 | 1.8593230  | 0.0000000 |
| C | -2.3225090 | 2.7678590  | 0.0000000 |
| C | -1.2718520 | 3.4943840  | 0.0000000 |

**C<sub>20</sub> C<sub>10h</sub>**

E = -761.308249

|   |             |            |            |
|---|-------------|------------|------------|
| C | 1.20382200  | 3.93675000 | 0.00000000 |
| C | 0.00000000  | 4.10985900 | 0.00000000 |
| C | -1.34005100 | 3.89248700 | 0.00000000 |
| C | -2.41571500 | 3.32494600 | 0.00000000 |



|   |             |             |            |
|---|-------------|-------------|------------|
| C | -3.37207000 | 2.36142600  | 0.00000000 |
| C | -3.90870800 | 1.27001600  | 0.00000000 |
| C | -4.11607400 | -0.07162000 | 0.00000000 |
| C | -3.90870800 | -1.27001600 | 0.00000000 |
| C | -3.28787700 | -2.47730900 | 0.00000000 |
| C | -2.41571500 | -3.32494600 | 0.00000000 |
| C | -1.20382200 | -3.93675000 | 0.00000000 |
| C | 0.00000000  | -4.10985900 | 0.00000000 |
| C | 1.34005100  | -3.89248700 | 0.00000000 |
| C | 2.41571500  | -3.32494600 | 0.00000000 |
| C | 3.37207000  | -2.36142600 | 0.00000000 |
| C | 3.90870800  | -1.27001600 | 0.00000000 |
| C | 4.11607400  | 0.07162000  | 0.00000000 |
| C | 3.90870800  | 1.27001600  | 0.00000000 |
| C | 3.28787700  | 2.47730900  | 0.00000000 |
| C | 2.41571500  | 3.32494600  | 0.00000000 |

**C<sub>22</sub> C<sub>11h</sub>**

E = -837.462203

|   |             |             |            |
|---|-------------|-------------|------------|
| C | 0.57579800  | 4.47169300  | 0.00000000 |
| C | -0.64304500 | 4.47247600  | 0.00000000 |
| C | -1.93318700 | 4.07312800  | 0.00000000 |
| C | -2.95896700 | 3.41483000  | 0.00000000 |
| C | -3.82840000 | 2.38137300  | 0.00000000 |
| C | -4.33543800 | 1.27299900  | 0.00000000 |
| C | -4.50812200 | -0.06645100 | 0.00000000 |
| C | -4.33543800 | -1.27299900 | 0.00000000 |
| C | -3.75654800 | -2.49317700 | 0.00000000 |

|   |             |             |            |
|---|-------------|-------------|------------|
| C | -2.95896700 | -3.41483000 | 0.00000000 |
| C | -1.81229600 | -4.12833700 | 0.00000000 |
| C | -0.64304500 | -4.47247600 | 0.00000000 |
| C | 0.70734700  | -4.45277900 | 0.00000000 |
| C | 1.87703900  | -4.11014300 | 0.00000000 |
| C | 3.00241200  | -3.36349500 | 0.00000000 |
| C | 3.80117700  | -2.44286800 | 0.00000000 |
| C | 4.34423300  | -1.20632600 | 0.00000000 |
| C | 4.51846800  | 0.00000000  | 0.00000000 |
| C | 4.30679000  | 1.33384400  | 0.00000000 |
| C | 3.80117700  | 2.44286800  | 0.00000000 |
| C | 2.90197200  | 3.45052700  | 0.00000000 |
| C | 1.87703900  | 4.11014300  | 0.00000000 |

**C<sub>22</sub> D<sub>11h</sub> TS**

E = -837.423290

|   |             |             |            |
|---|-------------|-------------|------------|
| C | 0.00000000  | 4.43090000  | 0.00000000 |
| C | -1.27217100 | 4.33124200  | 0.00000000 |
| C | -2.39672700 | 3.72824700  | 0.00000000 |
| C | -3.41334600 | 2.95701900  | 0.00000000 |
| C | -4.03352400 | 1.84183700  | 0.00000000 |
| C | -4.47118600 | 0.64316600  | 0.00000000 |
| C | -4.38871200 | -0.63021800 | 0.00000000 |
| C | -4.10813600 | -1.87505100 | 0.00000000 |
| C | -3.35039500 | -2.90174300 | 0.00000000 |
| C | -2.44148800 | -3.79740700 | 0.00000000 |
| C | -1.24893300 | -4.25141800 | 0.00000000 |
| C | -0.00016200 | -4.51360400 | 0.00000000 |

|   |            |             |            |
|---|------------|-------------|------------|
| C | 1.24876100 | -4.25179400 | 0.00000000 |
| C | 2.44121600 | -3.79770100 | 0.00000000 |
| C | 3.35061200 | -2.90249600 | 0.00000000 |
| C | 4.10870700 | -1.87606900 | 0.00000000 |
| C | 4.38918900 | -0.63118800 | 0.00000000 |
| C | 4.47158500 | 0.64222100  | 0.00000000 |
| C | 4.03328600 | 1.84065400  | 0.00000000 |
| C | 3.41287700 | 2.95571400  | 0.00000000 |
| C | 2.39648400 | 3.72718000  | 0.00000000 |
| C | 1.27206400 | 4.33050900  | 0.00000000 |

**C<sub>24</sub> C<sub>12h</sub>**

E = -913.605670

|   |             |             |            |
|---|-------------|-------------|------------|
| C | 4.89181400  | 0.60809900  | 0.00000000 |
| C | 4.53213800  | 1.91472200  | 0.00000000 |
| C | 3.93226300  | 2.97256700  | 0.00000000 |
| C | 2.96761000  | 3.92439700  | 0.00000000 |
| C | 1.91930400  | 4.54089500  | 0.00000000 |
| C | 0.60806600  | 4.88299300  | 0.00000000 |
| C | -0.60806700 | 4.89239300  | 0.00000000 |
| C | -1.91448100 | 4.53243300  | 0.00000000 |
| C | -2.97226900 | 3.93237700  | 0.00000000 |
| C | -3.92397300 | 2.96763900  | 0.00000000 |
| C | -4.54042200 | 1.91929200  | 0.00000000 |
| C | -4.88252100 | 0.60806200  | 0.00000000 |
| C | -4.89198100 | -0.60807400 | 0.00000000 |
| C | -4.53213200 | -1.91451700 | 0.00000000 |
| C | -3.93218600 | -2.97236800 | 0.00000000 |

|   |             |             |            |
|---|-------------|-------------|------------|
| C | -2.96755500 | -3.92418100 | 0.00000000 |
| C | -1.91927200 | -4.54073600 | 0.00000000 |
| C | -0.60806700 | -4.88294000 | 0.00000000 |
| C | 0.60806600  | -4.89245000 | 0.00000000 |
| C | 1.91451300  | -4.53259500 | 0.00000000 |
| C | 2.97232100  | -3.93259300 | 0.00000000 |
| C | 3.92404500  | -2.96783400 | 0.00000000 |
| C | 4.54042400  | -1.91949400 | 0.00000000 |
| C | 4.88235900  | -0.60808800 | 0.00000000 |

**C<sub>26</sub> C<sub>13h</sub>**

E = -989.753925

|   |             |             |            |
|---|-------------|-------------|------------|
| C | 3.99206500  | 3.53666100  | 0.00000000 |
| C | 0.57416600  | 5.29264100  | 0.00000000 |
| C | 5.17836600  | 1.27635300  | 0.00000000 |
| C | 4.68192200  | 2.53403300  | 0.00000000 |
| C | 1.89123000  | -4.98676300 | 0.00000000 |
| C | 3.07990100  | -4.34234100 | 0.00000000 |
| C | 3.99206500  | -3.53666100 | 0.00000000 |
| C | 4.74510300  | -2.41365100 | 0.00000000 |
| C | 5.17836600  | -1.27635300 | 0.00000000 |
| C | 5.32326000  | 0.06797800  | 0.00000000 |
| C | -0.64286400 | 5.29445700  | 0.00000000 |
| C | -1.95121400 | 4.95322900  | 0.00000000 |
| C | -3.02968400 | 4.38925600  | 0.00000000 |
| C | -4.02959500 | 3.47909200  | 0.00000000 |
| C | -3.02968400 | -4.38925600 | 0.00000000 |
| C | -1.82409400 | -5.00144000 | 0.00000000 |

|   |             |             |            |
|---|-------------|-------------|------------|
| C | 0.70913000  | -5.27625300 | 0.00000000 |
| C | -0.64286400 | -5.29445700 | 0.00000000 |
| C | -5.15230700 | -1.33994200 | 0.00000000 |
| C | -5.33334400 | 0.00000000  | 0.00000000 |
| C | -5.18484400 | 1.20793700  | 0.00000000 |
| C | -4.72244100 | 2.47852800  | 0.00000000 |
| C | 1.89123000  | 4.98676300  | 0.00000000 |
| C | 2.96801200  | 4.41957300  | 0.00000000 |
| C | -4.72244100 | -2.47852800 | 0.00000000 |
| C | -3.93944000 | -3.58085600 | 0.00000000 |

**C<sub>26</sub> D<sub>13h</sub> TS**

E = -989.694306

|   |            |            |            |
|---|------------|------------|------------|
| C | 0.5993758  | 5.2117963  | -0.0006111 |
| C | -0.6746203 | 5.2759736  | -0.0002328 |
| C | -1.8913579 | 4.8929044  | -0.0011626 |
| C | -3.0494916 | 4.3581542  | -0.0006488 |
| C | -3.9490533 | 3.4537415  | -0.0013906 |
| C | -4.7262489 | 2.4422245  | -0.0006315 |
| C | -5.1021778 | 1.2232467  | -0.0011087 |
| C | -5.3195518 | -0.0337151 | -0.0005291 |
| C | -5.0855967 | -1.2877024 | -0.0011518 |
| C | -4.6938637 | -2.5016727 | -0.0001669 |
| C | -3.9040811 | -3.5034083 | -0.0006701 |
| C | -2.9933723 | -4.3966039 | 0.0003747  |
| C | -1.8287873 | -4.9171590 | 0.0000369  |
| C | -0.6073461 | -5.2850130 | 0.0008381  |
| C | 0.6657340  | -5.2045071 | 0.0002194  |

|   |           |            |            |
|---|-----------|------------|------------|
| C | 1.9181889 | -4.9624736 | 0.0012008  |
| C | 3.0077169 | -4.2990405 | 0.0007121  |
| C | 4.0038606 | -3.5022292 | 0.0014816  |
| C | 4.6602888 | -2.4084696 | 0.0007135  |
| C | 5.1720898 | -1.2400131 | 0.0012604  |
| C | 5.2452476 | 0.0334994  | 0.0002136  |
| C | 5.1560467 | 1.3059843  | 0.0008703  |
| C | 4.6295338 | 2.4678612  | -0.0000648 |
| C | 3.9594702 | 3.5533171  | 0.0005358  |
| C | 2.9531346 | 4.3372228  | -0.0003708 |
| C | 1.8548609 | 4.9860813  | 0.0002822  |

**C<sub>28</sub> C<sub>14h</sub>**

E = -1065.897865

|   |            |             |            |
|---|------------|-------------|------------|
| C | 0.01166100 | -0.02217400 | 0.00000000 |
| C | 1.22772100 | -0.01900200 | 0.00000000 |
| C | 2.54222200 | 0.30471700  | 0.00000000 |
| C | 3.63665400 | 0.83482400  | 0.00000000 |
| C | 4.68019000 | 1.69715000  | 0.00000000 |
| C | 5.43648900 | 2.64941000  | 0.00000000 |
| C | 6.00280100 | 3.87898200  | 0.00000000 |
| C | 6.26968900 | 5.06538600  | 0.00000000 |
| C | 6.24506600 | 6.41890900  | 0.00000000 |
| C | 5.97094700 | 7.60365300  | 0.00000000 |
| C | 5.36104500 | 8.81219500  | 0.00000000 |
| C | 4.59933700 | 9.76013400  | 0.00000000 |
| C | 3.52562800 | 10.58465100 | 0.00000000 |
| C | 2.42828100 | 11.10868500 | 0.00000000 |
| C | 1.10320600 | 11.38586500 | 0.00000000 |

|   |             |             |            |
|---|-------------|-------------|------------|
| C | -0.11285400 | 11.38269300 | 0.00000000 |
| C | -1.42735400 | 11.05897400 | 0.00000000 |
| C | -2.52178600 | 10.52886700 | 0.00000000 |
| C | -3.56532200 | 9.66654000  | 0.00000000 |
| C | -4.32162200 | 8.71428100  | 0.00000000 |
| C | -4.88793400 | 7.48470800  | 0.00000000 |
| C | -5.15482200 | 6.29830500  | 0.00000000 |
| C | -5.13019900 | 4.94478200  | 0.00000000 |
| C | -4.85608000 | 3.76003700  | 0.00000000 |
| C | -4.24617700 | 2.55149600  | 0.00000000 |
| C | -3.48447000 | 1.60355700  | 0.00000000 |
| C | -2.41076000 | 0.77904000  | 0.00000000 |
| C | -1.31341400 | 0.25500600  | 0.00000000 |
